# Supplementary material for: SEMG1/2 augment energy metabolism of tumor cells
Source: PubMed Central journal article supplement (PMC7733513; doi:10.1038/s41419-020-03251-w), 2020-12-11

**PROTEINS ASSOCIATED ONLY WITH SEMG1**

| Identified protein | Accession Number | Molecular weight | Number of peptides associated with corresponding recombinant protein |           |           | Assigned number of protein function |                                                    |
|--------------------|------------------|------------------|----------------------------------------------------------------------|-----------|-----------|-------------------------------------|----------------------------------------------------|
|                    |                  |                  | GST                                                                  | GST-SEMG1 | GST-SEMG2 |                                     |                                                    |
| CYC1               | P08574           | 35 kDa           | 0                                                                    | 3         | 0         | 1                                   | Cytochrome c1, heme protein, mitochondrial         |
| PAICS              | E9PBS1 (+1)      | 46 kDa           | 0                                                                    | 3         | 0         | 1                                   | Multifunctional protein ADE2                       |
| MTHFD1             | F5H2F4 (+1)      | 111 kDa          | 0                                                                    | 3         | 0         | 1                                   | C-1-tetrahydrofolate synthase, cytoplasmic         |
| PFKM               | P08237           | 85 kDa           | 0                                                                    | 3         | 0         | 1                                   | ATP-dependent 6-phosphofructokinase, muscle type   |
| PFKL               | P17858           | 85 kDa           | 0                                                                    | 4         | 0         | 1                                   | ATP-dependent 6-phosphofructokinase, liver type    |
| SLC3A2             | F5GZS6 (+2)      | 65 kDa           | 0                                                                    | 4         | 0         | 1                                   | 4F2 cell-surface antigen heavy chain               |
| IDH2               | P48735           | 51 kDa           | 0                                                                    | 4         | 0         | 1                                   | Isocitrate dehydrogenase [NADP], mitochondrial     |
| ALDH18A1           | P54886           | 87 kDa           | 0                                                                    | 4         | 0         | 1                                   | Delta-1-pyrroline-5-carboxylate synthase           |
| SLC25A5            | P05141           | 33 kDa           | 0                                                                    | 5         | 0         | 1                                   | ADP/ATP translocase 2 OS=Homo sapiens              |
| LDHA               | P00338           | 37 kDa           | 0                                                                    | 5         | 0         | 1                                   | L-lactate dehydrogenase A chain                    |
| ATP5O P            | P48047           | 23 kDa           | 0                                                                    | 7         | 0         | 1                                   | ATP synthase subunit O, mitochondrial              |
| ATP5B              | H0YH81 (+1)      | 38 kDa           | 0                                                                    | 7         | 0         | 1                                   | ATP synthase subunit beta                          |
| PFKP               | Q01813           | 86 kDa           | 0                                                                    | 10        | 0         | 1                                   | ATP-dependent 6-phosphofructokinase, platelet type |

|        |                 |        |   |           |   |   |                                      |
|--------|-----------------|--------|---|-----------|---|---|--------------------------------------|
| ATP5A1 | P25705          | 60 kDa | 0 | <b>13</b> | 0 | 1 | ATP synthase subunit alpha,          |
| RPL27A | E9PLL6 (+1)     | 12 kDa | 0 | <b>3</b>  | 0 | 2 | 60S ribosomal protein L27a           |
| RPS20  | P60866          | 13 kDa | 0 | <b>3</b>  | 0 | 2 | 40S ribosomal protein S20            |
| RPL24  | C9JNW5 (+2)     | 18 kDa | 0 | <b>3</b>  | 0 | 2 | 60S ribosomal protein L24            |
| RPL9   | D6RAN4 (+1)     | 21 kDa | 0 | <b>3</b>  | 0 | 2 | 60S ribosomal protein L9             |
| RPLP0  | F8VU65 (+3)     | 27 kDa | 0 | <b>3</b>  | 0 | 2 | 60S acidic ribosomal protein P0      |
| RPL21  | P46778          | 19 kDa | 0 | <b>4</b>  | 0 | 2 | 60S ribosomal protein L21            |
| RPL17  | A0A087WWH0 (+7) | 15 kDa | 0 | <b>4</b>  | 0 | 2 | 60S ribosomal protein L17            |
| RPL19  | J3KTE4 (+2)     | 23 kDa | 0 | <b>4</b>  | 0 | 2 | Ribosomal protein L19                |
| RPS15  | K7ELC2 (+2)     | 18 kDa | 0 | <b>4</b>  | 0 | 2 | 40S ribosomal protein S15            |
| RPL4   | P36578          | 48 kDa | 0 | <b>4</b>  | 0 | 2 | 60S ribosomal protein L4             |
| RPS25  | P62851          | 14 kDa | 0 | <b>5</b>  | 0 | 2 | 40S ribosomal protein S25            |
| RPL22  | P35268          | 15 kDa | 0 | <b>5</b>  | 0 | 2 | 60S ribosomal protein L22            |
| RPL31  | B7Z4C8 (+4)     | 15 kDa | 0 | <b>5</b>  | 0 | 2 | 60S ribosomal protein L31            |
| RPL23  | C9JD32 (+2)     | 10 kDa | 0 | <b>5</b>  | 0 | 2 | 60S ribosomal protein L23            |
| RPS13  | P62277          | 17 kDa | 0 | <b>6</b>  | 0 | 2 | 40S ribosomal protein S13            |
| RPS2   | E9PQD7 (+2)     | 25 kDa | 0 | <b>6</b>  | 0 | 2 | 40S ribosomal protein S2             |
| RPS13  | P62277          | 17 kDa | 0 | <b>8</b>  | 0 | 2 | Cluster of 40S ribosomal protein S13 |

|         |                 |         |   |    |   |   |                                                       |
|---------|-----------------|---------|---|----|---|---|-------------------------------------------------------|
| RPS14   | P62263          | 16 kDa  | 0 | 8  | 0 | 2 | 40S ribosomal protein S14                             |
| RPL13   | P26373          | 24 kDa  | 0 | 9  | 0 | 2 | 60S ribosomal protein L13                             |
| RPS11   | P62280          | 18 kDa  | 0 | 9  | 0 | 2 | 40S ribosomal protein S11                             |
| RPS3    | P23396          | 27 kDa  | 0 | 10 | 0 | 2 | 40S ribosomal protein S3                              |
| RPS18   | P62269          | 18 kDa  | 0 | 11 | 0 | 2 | 40S ribosomal protein S18                             |
| SERBP1  | Q8NC51          | 45 kDa  | 0 | 3  | 0 | 3 | Plasminogen activator inhibitor 1 RNA-binding protein |
| HNRNPF  | P52597          | 46 kDa  | 0 | 3  | 0 | 3 | Heterogeneous nuclear ribonucleoprotein F             |
| SRSF1   | J3KTL2 (+1)     | 28 kDa  | 0 | 3  | 0 | 3 | Serine/arginine-rich-splicing factor 1                |
| HP1BP3  | B0QZK4 (+2)     | 29 kDa  | 0 | 4  | 0 | 3 | Heterochromatin protein 1-binding protein 3           |
| HNRNPA3 | P51991          | 40 kDa  | 0 | 4  | 0 | 3 | Heterogeneous nuclear ribonucleoprotein A3            |
| PABPC1  | A0A087WTT1 (+2) | 59 kDa  | 0 | 4  | 0 | 3 | Polyadenylate-binding protein                         |
| SRSF2   | J3KP15 (+2)     | 15 kDa  | 0 | 4  | 0 | 3 | Serine/arginine-rich-splicing factor 2                |
| DDX6    | P26196          | 54 kDa  | 0 | 4  | 0 | 3 | Probable ATP-dependent RNA helicase DDX6              |
| YBX1    | P67809          | 36 kDa  | 0 | 6  | 0 | 3 | Nuclease-sensitive element-binding protein 1          |
| HNRNPK  | P61978          | 51 kDa  | 0 | 6  | 0 | 3 | Heterogeneous nuclear ribonucleoprotein K             |
| HNRNPD  | H0Y8G5 (+2)     | 30 kDa  | 0 | 6  | 0 | 3 | Heterogeneous nuclear ribonucleoprotein D0            |
| DHX9    | Q08211          | 141 kDa | 0 | 6  | 0 | 3 | ATP-dependent RNA helicase A                          |
| HSPA9   | P38646          | 74 kDa  | 0 | 3  | 0 | 4 | Stress-70 protein, mitochondrial                      |

|                 |                 |        |   |    |   |   |                                                     |
|-----------------|-----------------|--------|---|----|---|---|-----------------------------------------------------|
| PPIB            | P23284          | 24 kDa | 0 | 3  | 0 | 4 | Peptidyl-prolyl cis-trans isomerase B               |
| PDIA6           | Q15084          | 48 kDa | 0 | 4  | 0 | 4 | Protein disulfide-isomerase A6                      |
| CCT4            | P50991          | 58 kDa | 0 | 5  | 0 | 4 | T-complex protein 1 subunit delta                   |
| HSP90AB1        | P08238          | 83 kDa | 0 | 10 | 0 | 4 | Heat shock protein HSP 90-beta                      |
| HSP90AB1        | P08238          | 83 kDa | 0 | 11 | 0 | 4 | Cluster of Heat shock protein HSP 90-beta           |
| G3BP1           | Q13283          | 52 kDa | 0 | 3  | 0 | 5 | Ras GTPase-activating protein-binding protein 1     |
| STRAP           | Q9Y3F4          | 38 kDa | 0 | 6  | 0 | 5 | Serine-threonine kinase receptor-associated protein |
| RACK1           | P63244          | 35 kDa | 0 | 8  | 0 | 5 | Receptor of activated protein C kinase 1            |
| UBB             | B4DV12 (+16)    | 17 kDa | 0 | 3  | 0 | 7 | Polyubiquitin-B                                     |
| PHB             | C9JW96 (+1)     | 27 kDa | 0 | 3  | 0 | 6 | Prohibitin                                          |
| MCM3            | J3KQ69 (+1)     | 92 kDa | 0 | 3  | 0 | 6 | DNA replication licensing factor MCM3               |
| XRCC6           | B1AHC9 (+1)     | 64 kDa | 0 | 4  | 0 | 6 | X-ray repair cross-complementing protein 6          |
| DRG1            | Q9Y295          | 41 kDa | 0 | 4  | 0 | 6 | Developmentally-regulated GTP-binding protein 1     |
| hCG_20395<br>66 | A0A0U1RR32 (+8) | 18 kDa | 0 | 5  | 0 | 6 | Histone H2A                                         |
| ZNF90           | A0A087WZ27 (+2) | 14 kDa | 0 | 6  | 0 | 6 | Zinc finger protein 90                              |
| C14orf166       | Q9Y224          | 28 kDa | 0 | 7  | 0 | 6 | UPF0568 protein C14orf166                           |
| TRIM28          | Q13263          | 89 kDa | 0 | 8  | 0 | 6 | Transcription intermediary factor 1-beta            |
| EIF2S3          | P41091          | 51 kDa | 0 | 3  | 0 | 8 | Eukaryotic translation initiation factor 2          |

|        |        |         |   |    |   |   |                                                      |
|--------|--------|---------|---|----|---|---|------------------------------------------------------|
| LARS   | Q9P2J5 | 134 kDa | 0 | 3  | 0 | 8 | Leucine--tRNA ligase, cytoplasmic                    |
| EIF2S2 | P20042 | 38 kDa  | 0 | 3  | 0 | 8 | Eukaryotic translation initiation factor 2 subunit 2 |
| FARSB  | Q9NSD9 | 66 kDa  | 0 | 3  | 0 | 8 | Phenylalanine--tRNA ligase beta subunit              |
| EIF2S1 | P05198 | 36 kDa  | 0 | 4  | 0 | 8 | Eukaryotic translation initiation factor 2 subunit 1 |
| RARS   | P54136 | 75 kDa  | 0 | 4  | 0 | 8 | Arginine--tRNA ligase, cytoplasmic                   |
| EIF3D  | O15371 | 64 kDa  | 0 | 5  | 0 | 8 | Eukaryotic translation initiation factor 3 subunit D |
| MARS   | P56192 | 101 kDa | 0 | 5  | 0 | 8 | Methionine--tRNA ligase, cytoplasmic                 |
| EPRS   | P07814 | 171 kDa | 0 | 6  | 0 | 8 | Bifunctional glutamate/proline--tRNA ligase          |
| TUFM   | P49411 | 50 kDa  | 0 | 11 | 0 | 8 | Elongation factor Tu, mitochondrial O                |
| KIF5B  | P33176 | 110 kDa | 0 | 4  | 0 | 6 | Kinesin-1 heavy chain                                |
| COPA   | P53621 | 138 kDa | 0 | 6  | 0 | 6 | Coatomer subunit alpha                               |
| TRIM25 | Q14258 | 71 kDa  | 0 | 3  | 0 | 7 | E3 ubiquitin/ISG15 ligase TRIM25                     |
| UFL1   | O94874 | 90 kDa  | 0 | 3  | 0 | 7 | E3 UFM1-protein ligase 1                             |

| Assigned number of protein function | Protein function            | Number of proteins identified | Percentage |
|-------------------------------------|-----------------------------|-------------------------------|------------|
| 1                                   | Metabolic networks          | 14                            | 18         |
| 2                                   | Ribosomal proteins          | 22                            | 27         |
| 3                                   | RNA processing and splicing | 12                            | 15         |
| 8                                   | Regulation of Translation   | 10                            | 13         |
| 5                                   | Signaling                   | 3                             | 4          |
| 7                                   | Protein modifiers           | 3                             | 4          |
| 4                                   | Chaperons                   | 6                             | 7          |
| 6                                   | Other                       | 10                            | 12         |

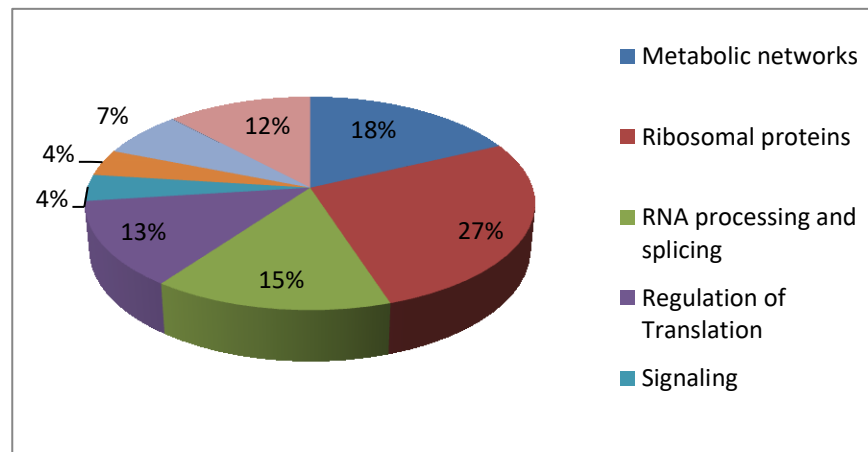

Supplement: 41419_2020_3251_MOESM12_ESM.pdf [file 41419_2020_3251_MOESM12_ESM.pdf]
