# Supplementary material for: SEMG1/2 augment energy metabolism of tumor cells
Source: PubMed Central journal article supplement (PMC7733513; doi:10.1038/s41419-020-03251-w), 2020-12-11
Supplement: 41419_2020_3251_MOESM9_ESM.pdf [file 41419_2020_3251_MOESM9_ESM.pdf]

## ALL PROTEINS IDENTIFIED

|    | Identified protein | Accession Number | Molecular weight | Number of peptides associated with corresponding recombinant protein |           |           |                                                      |
|----|--------------------|------------------|------------------|----------------------------------------------------------------------|-----------|-----------|------------------------------------------------------|
|    |                    |                  |                  | GST                                                                  | GST-SEMG1 | GST-SEMG2 |                                                      |
| 1  | PCBP1              | Q15365           | 37 kDa           | 0                                                                    | 5         | 4         | Poly(rC)-binding protein 1                           |
| 2  | ALDH18A1           | P54886           | 87 kDa           | 0                                                                    | 4         | 0         | Delta-1-pyrroline-5-carboxylate synthase             |
| 3  | ALYREF             | Q86V81           | 27 kDa           | 0                                                                    | 0         | 4         | THO complex subunit 4 OS                             |
| 4  | ATP5A1             | P25705           | 60 kDa           | 0                                                                    | 13        | 0         | ATP synthase subunit alpha,                          |
| 5  | ATP5B              | H0YH81 (+1)      | 38 kDa           | 0                                                                    | 7         | 0         | ATP synthase subunit beta                            |
| 6  | ATP5O P            | P48047           | 23 kDa           | 0                                                                    | 7         | 0         | ATP synthase subunit O, mitochondrial                |
| 7  | C14orf166          | Q9Y224           | 28 kDa           | 0                                                                    | 7         | 0         | UPF0568 protein C14orf166                            |
| 8  | CCT4               | P50991           | 58 kDa           | 0                                                                    | 5         | 0         | T-complex protein 1 subunit delta                    |
| 9  | COPA               | P53621           | 138 kDa          | 0                                                                    | 6         | 0         | Coatomer subunit alpha                               |
| 10 | CRIP2              | H0YFA4 (+1)      | 21 kDa           | 0                                                                    | 3         | 4         | Cysteine-rich protein 2                              |
| 11 | CSDE1              | O75534           | 89 kDa           | 0                                                                    | 7         | 3         | Cold shock domain-containing protein E1              |
| 12 | CYC1               | P08574           | 35 kDa           | 0                                                                    | 3         | 0         | Cytochrome c1, heme protein, mitochondrial           |
| 13 | DDX17              | Q92841 (+1)      | 80 kDa           | 0                                                                    | 3         | 2         | Probable ATP-dependent RNA helicase DDX17            |
| 14 | DDX17              | Q92841 [4]       | 80 kDa           | 0                                                                    | 15        | 13        | Probable ATP-dependent RNA helicase DDX17            |
| 15 | DDX3X              | A0A0D9SF53 (+3)  | 81 kDa           | 0                                                                    | 14        | 7         | ATP-dependent RNA helicase DDX3X                     |
| 16 | DDX5               | P17844 (+1)      | 69 kDa           | 0                                                                    | 9         | 9         | Probable ATP-dependent RNA helicase DDX5             |
| 17 | DDX6               | P26196           | 54 kDa           | 0                                                                    | 4         | 0         | Probable ATP-dependent RNA helicase DDX6             |
| 18 | DHX9               | Q08211           | 141 kDa          | 0                                                                    | 6         | 0         | ATP-dependent RNA helicase A                         |
| 19 | DRG1               | Q9Y295           | 41 kDa           | 0                                                                    | 4         | 0         | Developmentally-regulated GTP-binding protein 1      |
| 20 | EEF2               | P13639           | 95 kDa           | 0                                                                    | 18        | 9         | Elongation factor 2                                  |
| 21 | EIF2S1             | P05198           | 36 kDa           | 0                                                                    | 4         | 0         | Eukaryotic translation initiation factor 2 subunit 1 |
| 22 | EIF2S2             | P20042           | 38 kDa           | 0                                                                    | 3         | 0         | Eukaryotic translation initiation factor 2 subunit 2 |
| 23 | EIF2S3             | P41091           | 51 kDa           | 0                                                                    | 3         | 0         | Eukaryotic translation initiation factor 2           |
| 24 | EIF3D              | O15371           | 64 kDa           | 0                                                                    | 5         | 0         | Eukaryotic translation initiation factor 3 subunit D |
| 25 | EPRS               | P07814           | 171 kDa          | 0                                                                    | 6         | 0         | Bifunctional glutamate/proline--tRNA ligase          |
| 26 | FARSB              | Q9NSD9           | 66 kDa           | 0                                                                    | 3         | 0         | Phenylalanine--tRNA ligase beta subunit              |

|    |             |                 |         |   |    |    |                                                        |
|----|-------------|-----------------|---------|---|----|----|--------------------------------------------------------|
| 27 | FASN        | A0A0U1RQF0 (+1) | 273 kDa | 0 | 17 | 4  | Fatty acid synthase                                    |
| 28 | G3BP1       | Q13283          | 52 kDa  | 0 | 3  | 0  | Ras GTPase-activating protein-binding protein 1        |
| 29 | hCG_2039566 | A0A0U1RR32 (+8) | 18 kDa  | 0 | 5  | 0  | Histone H2A                                            |
| 30 | HIST1H1T    | P22492 [2]      | 22 kDa  | 0 | 3  | 4  | Cluster of Histone H1t                                 |
| 31 | HNRNPA1     | F8W6I7 (+1)     | 33 kDa  | 0 | 8  | 4  | Heterogeneous nuclear ribonucleoprotein A1             |
| 32 | HNRNPA2B1   | P22626          | 37 kDa  | 0 | 9  | 8  | Heterogeneous nuclear ribonucleoproteins A2/B1         |
| 33 | HNRNPA3     | P51991          | 40 kDa  | 0 | 4  | 0  | Heterogeneous nuclear ribonucleoprotein A3             |
| 34 | HNRNPD      | H0Y8G5 (+2)     | 30 kDa  | 0 | 6  | 0  | Heterogeneous nuclear ribonucleoprotein D0             |
| 35 | HNRNPF      | P52597          | 46 kDa  | 0 | 3  | 0  | Heterogeneous nuclear ribonucleoprotein F              |
| 36 | HNRNPK      | P61978          | 51 kDa  | 0 | 6  | 0  | Heterogeneous nuclear ribonucleoprotein K              |
| 37 | HNRNPM      | P52272          | 78 kDa  | 0 | 23 | 15 | Heterogeneous nuclear ribonucleoprotein M              |
| 38 | HNRNPM      | P52272          | 78 kDa  | 0 | 13 | 5  | Heterogeneous nuclear ribonucleoprotein M              |
| 39 | HNRNPU      | Q00839          | 91 kDa  | 0 | 20 | 5  | Heterogeneous nuclear ribonucleoprotein U              |
| 40 | HP1BP3      | B0QZK4 (+2)     | 29 kDa  | 0 | 4  | 0  | Heterochromatin protein 1-binding protein 3            |
| 41 | HSP90AB1    | P08238          | 83 kDa  | 0 | 11 | 0  | Cluster of Heat shock protein HSP 90-beta              |
| 42 | HSPA9       | P38646          | 74 kDa  | 0 | 3  | 0  | Stress-70 protein, mitochondrial                       |
| 43 | IDH2        | P48735          | 51 kDa  | 0 | 4  | 0  | Isocitrate dehydrogenase [NADP], mitochondrial         |
| 44 | KIF5B       | P33176          | 110 kDa | 0 | 4  | 0  | Kinesin-1 heavy chain                                  |
| 45 | LARS        | Q9P2J5          | 134 kDa | 0 | 3  | 0  | Leucine--tRNA ligase, cytoplasmic                      |
| 46 | LDHA        | P00338          | 37 kDa  | 0 | 5  | 0  | L-lactate dehydrogenase A chain                        |
| 47 | LRRC59      | Q96AG4          | 35 kDa  | 0 | 10 | 5  | Leucine-rich repeat-containing protein 59              |
| 48 | MARS        | P56192          | 101 kDa | 0 | 5  | 0  | Methionine--tRNA ligase, cytoplasmic                   |
| 49 | MCM3        | J3KQ69 (+1)     | 92 kDa  | 0 | 3  | 0  | DNA replication licensing factor MCM3                  |
| 50 | MTHFD1      | F5H2F4 (+1)     | 111 kDa | 0 | 3  | 0  | C-1-tetrahydrofolate synthase, cytoplasmic             |
| 51 | MYO6        | A0A0A0MRM8      | 145 kDa | 0 | 5  | 3  | Unconventional myosin-VI                               |
| 52 | NCL         | P19338          | 77 kDa  | 0 | 5  | 4  | Nucleolin                                              |
| 53 | NONO        | Q15233          | 54 kDa  | 0 | 3  | 11 | Non-POU domain-containing octamer-binding protein      |
| 54 | PABPC1      | A0A087WTT1 (+2) | 59 kDa  | 0 | 4  | 0  | Polyadenylate-binding protein                          |
| 55 | PAICS       | E9PBS1 (+1)     | 46 kDa  | 0 | 3  | 0  | Multifunctional protein ADE2                           |
| 56 | PCBP1       | Q15365 [5]      | 37 kDa  | 0 | 9  | 4  | Cluster of Poly(rC)-binding protein 1                  |
| 57 | PCK2        | Q16822          | 71 kDa  | 0 | 7  | 3  | Phosphoenolpyruvate carboxykinase [GTP], mitochondrial |
| 58 | PDIA3       | P30101          | 57 kDa  | 0 | 4  | 8  | Protein disulfide-isomerase A3                         |
| 59 | PDIA6       | Q15084          | 48 kDa  | 0 | 4  | 0  | Protein disulfide-isomerase A6                         |

|    |        |                 |        |   |    |    |                                                    |
|----|--------|-----------------|--------|---|----|----|----------------------------------------------------|
| 60 | PFKL   | P17858          | 85 kDa | 0 | 4  | 0  | ATP-dependent 6-phosphofructokinase, liver type    |
| 61 | PFKM   | P08237          | 85 kDa | 0 | 3  | 0  | ATP-dependent 6-phosphofructokinase, muscle type   |
| 62 | PFKP   | Q01813          | 86 kDa | 0 | 10 | 0  | ATP-dependent 6-phosphofructokinase, platelet type |
| 63 | PHB    | C9JW96 (+1)     | 27 kDa | 0 | 3  | 0  | Prohibitin                                         |
| 64 | PKM    | P14618          | 58 kDa | 0 | 23 | 14 | Pyruvate kinase PKM                                |
| 65 | PPIB   | P23284          | 24 kDa | 0 | 3  | 0  | Peptidyl-prolyl cis-trans isomerase B              |
| 66 | PSPC1  | Q8WXF1          | 59 kDa | 0 | 0  | 5  | Paraspeckle component 1                            |
| 67 | RACK1  | P63244          | 35 kDa | 0 | 8  | 0  | Receptor of activated protein C kinase 1           |
| 68 | RARS   | P54136          | 75 kDa | 0 | 4  | 0  | Arginine--tRNA ligase, cytoplasmic                 |
| 69 | RPL11  | P62913          | 20 kDa | 0 | 3  | 3  | 60S ribosomal protein L11                          |
| 70 | RPL13  | P26373          | 24 kDa | 0 | 9  | 0  | 60S ribosomal protein L13                          |
| 71 | RPL17  | A0A087WWHO (+7) | 15 kDa | 0 | 4  | 0  | 60S ribosomal protein L17                          |
| 72 | RPL19  | J3KTE4 (+2)     | 23 kDa | 0 | 4  | 0  | Ribosomal protein L19                              |
| 73 | RPL21  | P46778          | 19 kDa | 0 | 4  | 0  | 60S ribosomal protein L21                          |
| 74 | RPL22  | P35268          | 15 kDa | 0 | 5  | 0  | 60S ribosomal protein L22                          |
| 75 | RPL23  | C9JD32 (+2)     | 10 kDa | 0 | 5  | 0  | 60S ribosomal protein L23                          |
| 76 | RPL23A | P62750          | 18 kDa | 0 | 11 | 6  | 60S ribosomal protein L23a                         |
| 77 | RPL24  | C9JNW5 (+2)     | 18 kDa | 0 | 3  | 0  | 60S ribosomal protein L24                          |
| 78 | RPL26  | P61254 [3]      | 17 kDa | 0 | 8  | 6  | Cluster of 60S ribosomal protein L26               |
| 79 | RPL27A | E9PLL6 (+1)     | 12 kDa | 0 | 3  | 0  | 60S ribosomal protein L27a                         |
| 80 | RPL29  | P47914          | 18 kDa | 0 | 0  | 4  | 60S ribosomal protein L29                          |
| 81 | RPL31  | B7Z4C8 (+4)     | 15 kDa | 0 | 5  | 0  | 60S ribosomal protein L31                          |
| 82 | RPL35  | P42766          | 15 kDa | 0 | 5  | 3  | 60S ribosomal protein L35                          |
| 83 | RPL4   | P36578          | 48 kDa | 0 | 4  | 0  | 60S ribosomal protein L4                           |
| 84 | RPL9   | D6RAN4 (+1)     | 21 kDa | 0 | 3  | 0  | 60S ribosomal protein L9                           |
| 85 | RPLP0  | F8VU65 (+3)     | 27 kDa | 0 | 3  | 0  | 60S acidic ribosomal protein P0                    |
| 86 | RPS11  | P62280          | 18 kDa | 0 | 9  | 0  | 40S ribosomal protein S11                          |
| 87 | RPS13  | P62277          | 17 kDa | 0 | 6  | 0  | 40S ribosomal protein S13                          |
| 88 | RPS13  | P62277          | 17 kDa | 0 | 8  | 0  | Cluster of 40S ribosomal protein S13               |
| 89 | RPS14  | P62263          | 16 kDa | 0 | 8  | 0  | 40S ribosomal protein S14                          |
| 90 | RPS15  | K7ELC2 (+2)     | 18 kDa | 0 | 4  | 0  | 40S ribosomal protein S15                          |
| 91 | RPS17  | P08708          | 16 kDa | 0 | 6  | 3  | 40S ribosomal protein S17                          |
| 92 | RPS18  | P62269          | 18 kDa | 0 | 11 | 0  | 40S ribosomal protein S18                          |

|     |         |                 |        |   |    |    |                                                       |
|-----|---------|-----------------|--------|---|----|----|-------------------------------------------------------|
| 93  | RPS2    | E9PQD7 (+2)     | 25 kDa | 0 | 6  | 0  | 40S ribosomal protein S2                              |
| 94  | RPS20   | P60866          | 13 kDa | 0 | 3  | 0  | 40S ribosomal protein S20                             |
| 95  | RPS25   | P62851          | 14 kDa | 0 | 5  | 0  | 40S ribosomal protein S25                             |
| 96  | RPS3    | P23396          | 27 kDa | 0 | 10 | 0  | 40S ribosomal protein S3                              |
| 97  | RPS4X   | P62701          | 30 kDa | 0 | 9  | 3  | 40S ribosomal protein S4, X isoform                   |
| 98  | RPS5    | P46782 (+1)     | 23 kDa | 0 | 10 | 8  | 40S ribosomal protein S5                              |
| 99  | RPS6    | P62753          | 29 kDa | 0 | 5  | 4  | 40S ribosomal protein S6                              |
| 100 | RPS7    | P62081          | 22 kDa | 0 | 10 | 4  | 40S ribosomal protein S7                              |
| 101 | RTCB    | Q9Y3I0          | 55 kDa | 0 | 7  | 6  | tRNA-splicing ligase RtcB homolog                     |
| 102 | SERBP1  | Q8NC51          | 45 kDa | 0 | 3  | 0  | Plasminogen activator inhibitor 1 RNA-binding protein |
| 103 | SFPQ    | P23246          | 76 kDa | 0 | 7  | 14 | Splicing factor, proline- and glutamine-rich          |
| 104 | SHMT2   | P34897          | 56 kDa | 0 | 8  | 3  | Serine hydroxymethyltransferase, mitochondrial        |
| 105 | SLC25A5 | P05141          | 33 kDa | 0 | 5  | 0  | ADP/ATP translocase 2 OS=Homo sapiens                 |
| 106 | SLC3A2  | F5GZS6 (+2)     | 65 kDa | 0 | 4  | 0  | 4F2 cell-surface antigen heavy chain                  |
| 107 | SRSF1   | J3KTL2 (+1)     | 28 kDa | 0 | 3  | 0  | Serine/arginine-rich-splicing factor 1                |
| 108 | SRSF2   | J3KP15 (+2)     | 15 kDa | 0 | 4  | 0  | Serine/arginine-rich-splicing factor 2                |
| 109 | STRAP   | Q9Y3F4          | 38 kDa | 0 | 6  | 0  | Serine-threonine kinase receptor-associated protein   |
| 110 | SYNCRIP | O60506          | 70 kDa | 0 | 8  | 2  | Heterogeneous nuclear ribonucleoprotein Q             |
| 111 | TRIM25  | Q14258          | 71 kDa | 0 | 3  | 0  | E3 ubiquitin/ISG15 ligase TRIM25                      |
| 112 | TRIM28  | Q13263          | 89 kDa | 0 | 8  | 0  | Transcription intermediary factor 1-beta              |
| 113 | TUFM    | P49411          | 50 kDa | 0 | 11 | 0  | Elongation factor Tu, mitochondrial O                 |
| 114 | UBB     | B4DV12 (+16)    | 17 kDa | 0 | 3  | 0  | Polyubiquitin-B                                       |
| 115 | UFL1    | O94874          | 90 kDa | 0 | 3  | 0  | E3 UFM1-protein ligase 1                              |
| 116 | USP10   | Q14694          | 87 kDa | 0 | 3  | 3  | Ubiquitin carboxyl-terminal hydrolase 10              |
| 117 | XRCC6   | B1AHC9 (+1)     | 64 kDa | 0 | 4  | 0  | X-ray repair cross-complementing protein 6            |
| 118 | YBX1    | P67809          | 36 kDa | 0 | 6  | 0  | Nuclease-sensitive element-binding protein 1          |
| 119 | ZNF90   | A0A087WZ27 (+2) | 14 kDa | 0 | 6  | 0  | Zinc finger protein 90                                |
