# Supplementary material for: SEMG1/2 augment energy metabolism of tumor cells
Source: PubMed Central journal article supplement (PMC7733513; doi:10.1038/s41419-020-03251-w), 2020-12-11
Supplement: 41419_2020_3251_MOESM10_ESM.pdf [file 41419_2020_3251_MOESM10_ESM.pdf]

**ALL PROTEINS ASSOCIATED WITH SEMG1**

|    | Identified protein | Accession Number | Molecular weight | Number of peptides associated with corresponding recombinant protein |           |           | Assigned number of protein function |                                                        |
|----|--------------------|------------------|------------------|----------------------------------------------------------------------|-----------|-----------|-------------------------------------|--------------------------------------------------------|
|    |                    |                  |                  | GST                                                                  | GST-SEMG1 | GST-SEMG2 |                                     |                                                        |
| 1  | CYC1               | P08574           | 35 kDa           | 0                                                                    | 3         | 0         | 1                                   | Cytochrome c1, heme protein, mitochondrial             |
| 2  | PAICS              | E9PBS1 (+1)      | 46 kDa           | 0                                                                    | 3         | 0         | 1                                   | Multifunctional protein ADE2                           |
| 3  | MTHFD1             | F5H2F4 (+1)      | 111 kDa          | 0                                                                    | 3         | 0         | 1                                   | C-1-tetrahydrofolate synthase, cytoplasmic             |
| 4  | PFKM               | P08237           | 85 kDa           | 0                                                                    | 3         | 0         | 1                                   | ATP-dependent 6-phosphofructokinase, muscle type       |
| 5  | PFKL               | P17858           | 85 kDa           | 0                                                                    | 4         | 0         | 1                                   | ATP-dependent 6-phosphofructokinase, liver type        |
| 6  | SLC3A2             | F5GZS6 (+2)      | 65 kDa           | 0                                                                    | 4         | 0         | 1                                   | 4F2 cell-surface antigen heavy chain                   |
| 7  | IDH2               | P48735           | 51 kDa           | 0                                                                    | 4         | 0         | 1                                   | Isocitrate dehydrogenase [NADP], mitochondrial         |
| 8  | ALDH18A1           | P54886           | 87 kDa           | 0                                                                    | 4         | 0         | 1                                   | Delta-1-pyrroline-5-carboxylate synthase               |
| 9  | SLC25A5            | P05141           | 33 kDa           | 0                                                                    | 5         | 0         | 1                                   | ADP/ATP translocase 2 OS=Homo sapiens                  |
| 10 | LDHA               | P00338           | 37 kDa           | 0                                                                    | 5         | 0         | 1                                   | L-lactate dehydrogenase A chain                        |
| 11 | ATP5O P            | P48047           | 23 kDa           | 0                                                                    | 7         | 0         | 1                                   | ATP synthase subunit O, mitochondrial                  |
| 12 | ATP5B              | H0YH81 (+1)      | 38 kDa           | 0                                                                    | 7         | 0         | 1                                   | ATP synthase subunit beta                              |
| 13 | PCK2               | Q16822           | 71 kDa           | 0                                                                    | 7         | 3         | 1                                   | Phosphoenolpyruvate carboxykinase [GTP], mitochondrial |
| 14 | SHMT2              | P34897           | 56 kDa           | 0                                                                    | 8         | 3         | 1                                   | Serine hydroxymethyltransferase, mitochondrial         |
| 15 | PFKP               | Q01813           | 86 kDa           | 0                                                                    | 10        | 0         | 1                                   | ATP-dependent 6-phosphofructokinase, platelet type     |
| 16 | ATP5A1             | P25705           | 60 kDa           | 0                                                                    | 13        | 0         | 1                                   | ATP synthase subunit alpha,                            |
| 17 | FASN               | A0A0U1RQF0 (+1)  | 273 kDa          | 0                                                                    | 17        | 4         | 1                                   | Fatty acid synthase                                    |
| 18 | PKM                | P14618           | 58 kDa           | 0                                                                    | 23        | 14        | 1                                   | Pyruvate kinase PKM                                    |
| 19 | RPL27A             | E9PLL6 (+1)      | 12 kDa           | 0                                                                    | 3         | 0         | 2                                   | 60S ribosomal protein L27a                             |
| 20 | RPS20              | P60866           | 13 kDa           | 0                                                                    | 3         | 0         | 2                                   | 40S ribosomal protein S20                              |
| 21 | RPL24              | C9JNW5 (+2)      | 18 kDa           | 0                                                                    | 3         | 0         | 2                                   | 60S ribosomal protein L24                              |
| 22 | RPL9               | D6RAN4 (+1)      | 21 kDa           | 0                                                                    | 3         | 0         | 2                                   | 60S ribosomal protein L9                               |

|    |         |                 |        |   |    |    |   |                                                       |
|----|---------|-----------------|--------|---|----|----|---|-------------------------------------------------------|
| 23 | RPLP0   | F8VU65 (+3)     | 27 kDa | 0 | 3  | 0  | 2 | 60S acidic ribosomal protein P0                       |
| 24 | RPL11   | P62913          | 20 kDa | 0 | 3  | 3  | 2 | 60S ribosomal protein L11                             |
| 25 | RPL21   | P46778          | 19 kDa | 0 | 4  | 0  | 2 | 60S ribosomal protein L21                             |
| 26 | RPL17   | A0A087WWH0 (+7) | 15 kDa | 0 | 4  | 0  | 2 | 60S ribosomal protein L17                             |
| 27 | RPL19   | J3KTE4 (+2)     | 23 kDa | 0 | 4  | 0  | 2 | Ribosomal protein L19                                 |
| 28 | RPS15   | K7ELC2 (+2)     | 18 kDa | 0 | 4  | 0  | 2 | 40S ribosomal protein S15                             |
| 29 | RPL4    | P36578          | 48 kDa | 0 | 4  | 0  | 2 | 60S ribosomal protein L4                              |
| 30 | RPS25   | P62851          | 14 kDa | 0 | 5  | 0  | 2 | 40S ribosomal protein S25                             |
| 31 | RPL22   | P35268          | 15 kDa | 0 | 5  | 0  | 2 | 60S ribosomal protein L22                             |
| 32 | RPL31   | B7Z4C8 (+4)     | 15 kDa | 0 | 5  | 0  | 2 | 60S ribosomal protein L31                             |
| 33 | RPL23   | C9JD32 (+2)     | 10 kDa | 0 | 5  | 0  | 2 | 60S ribosomal protein L23                             |
| 34 | RPL35   | P42766          | 15 kDa | 0 | 5  | 3  | 2 | 60S ribosomal protein L35                             |
| 35 | RPS6    | P62753          | 29 kDa | 0 | 5  | 4  | 2 | 40S ribosomal protein S6                              |
| 36 | RPS13   | P62277          | 17 kDa | 0 | 6  | 0  | 2 | 40S ribosomal protein S13                             |
| 37 | RPS2    | E9PQD7 (+2)     | 25 kDa | 0 | 6  | 0  | 2 | 40S ribosomal protein S2                              |
| 38 | RPS17   | P08708          | 16 kDa | 0 | 6  | 3  | 2 | 40S ribosomal protein S17                             |
| 39 | RPS13   | P62277          | 17 kDa | 0 | 8  | 0  | 2 | Cluster of 40S ribosomal protein S13                  |
| 40 | RPS14   | P62263          | 16 kDa | 0 | 8  | 0  | 2 | 40S ribosomal protein S14                             |
| 41 | RPL26   | P61254 [3]      | 17 kDa | 0 | 8  | 6  | 2 | Cluster of 60S ribosomal protein L26                  |
| 42 | RPL13   | P26373          | 24 kDa | 0 | 9  | 0  | 2 | 60S ribosomal protein L13                             |
| 43 | RPS11   | P62280          | 18 kDa | 0 | 9  | 0  | 2 | 40S ribosomal protein S11                             |
| 44 | RPS4X   | P62701          | 30 kDa | 0 | 9  | 3  | 2 | 40S ribosomal protein S4, X isoform                   |
| 45 | RPS3    | P23396          | 27 kDa | 0 | 10 | 0  | 2 | 40S ribosomal protein S3                              |
| 46 | RPS7    | P62081          | 22 kDa | 0 | 10 | 4  | 2 | 40S ribosomal protein S7                              |
| 47 | RPS5    | P46782 (+1)     | 23 kDa | 0 | 10 | 8  | 2 | 40S ribosomal protein S5                              |
| 48 | RPS18   | P62269          | 18 kDa | 0 | 11 | 0  | 2 | 40S ribosomal protein S18                             |
| 49 | RPL23A  | P62750          | 18 kDa | 0 | 11 | 6  | 2 | 60S ribosomal protein L23a                            |
| 50 | SERBP1  | Q8NC51          | 45 kDa | 0 | 3  | 0  | 3 | Plasminogen activator inhibitor 1 RNA-binding protein |
| 51 | HNRNPF  | P52597          | 46 kDa | 0 | 3  | 0  | 3 | Heterogeneous nuclear ribonucleoprotein F             |
| 52 | SRSF1   | J3KTL2 (+1)     | 28 kDa | 0 | 3  | 0  | 3 | Serine/arginine-rich-splicing factor 1                |
| 53 | DDX17   | Q92841 (+1)     | 80 kDa | 0 | 3  | 2  | 3 | Probable ATP-dependent RNA helicase DDX17             |
| 54 | NONO    | Q15233          | 54 kDa | 0 | 3  | 11 | 3 | Non-POU domain-containing octamer-binding protein     |
| 55 | HP1BP3  | B0QZK4 (+2)     | 29 kDa | 0 | 4  | 0  | 3 | Heterochromatin protein 1-binding protein 3           |
| 56 | HNRNPA3 | P51991          | 40 kDa | 0 | 4  | 0  | 3 | Heterogeneous nuclear ribonucleoprotein A3            |
| 57 | PABPC1  | A0A087WTT1 (+2) | 59 kDa | 0 | 4  | 0  | 3 | Polyadenylate-binding protein                         |
| 58 | SRSF2   | J3KP15 (+2)     | 15 kDa | 0 | 4  | 0  | 3 | Serine/arginine-rich-splicing factor 2                |

|    |           |                 |         |   |    |    |  |   |                                                |
|----|-----------|-----------------|---------|---|----|----|--|---|------------------------------------------------|
| 59 | DDX6      | P26196          | 54 kDa  | 0 | 4  | 0  |  | 3 | Probable ATP-dependent RNA helicase DDX6       |
| 60 | PCBP1     | Q15365          | 37 kDa  | 0 | 5  | 4  |  | 3 | Poly(rC)-binding protein 1                     |
| 61 | YBX1      | P67809          | 36 kDa  | 0 | 6  | 0  |  | 3 | Nuclease-sensitive element-binding protein 1   |
| 62 | HNRNPK    | P61978          | 51 kDa  | 0 | 6  | 0  |  | 3 | Heterogeneous nuclear ribonucleoprotein K      |
| 63 | HNRNPD    | H0Y8G5 (+2)     | 30 kDa  | 0 | 6  | 0  |  | 3 | Heterogeneous nuclear ribonucleoprotein D0     |
| 64 | DHX9      | Q08211          | 141 kDa | 0 | 6  | 0  |  | 3 | ATP-dependent RNA helicase A                   |
| 65 | RTCB      | Q9Y310          | 55 kDa  | 0 | 7  | 6  |  | 3 | tRNA-splicing ligase RtcB homolog              |
| 66 | SFPQ      | P23246          | 76 kDa  | 0 | 7  | 14 |  | 3 | Splicing factor, proline- and glutamine-rich   |
| 67 | SYNCRIP   | O60506          | 70 kDa  | 0 | 8  | 2  |  | 3 | Heterogeneous nuclear ribonucleoprotein Q      |
| 68 | HNRNPA1   | F8W617 (+1)     | 33 kDa  | 0 | 8  | 4  |  | 3 | Heterogeneous nuclear ribonucleoprotein A1     |
| 69 | PCBP1     | Q15365 [5]      | 37 kDa  | 0 | 9  | 4  |  | 3 | Cluster of Poly(rC)-binding protein 1          |
| 70 | HNRNPA2B1 | P22626          | 37 kDa  | 0 | 9  | 8  |  | 3 | Heterogeneous nuclear ribonucleoproteins A2/B1 |
| 71 | DDX5      | P17844 (+1)     | 69 kDa  | 0 | 9  | 9  |  | 3 | Probable ATP-dependent RNA helicase DDX5       |
| 72 | DDX1      | Q92499          | 82 kDa  | 0 | 11 | 3  |  | 3 | ATP-dependent RNA helicase DDX1                |
| 73 | HNRNPM    | P52272          | 78 kDa  | 0 | 13 | 5  |  | 3 | Heterogeneous nuclear ribonucleoprotein M      |
| 74 | DDX3X     | A0A0D9SF53 (+3) | 81 kDa  | 0 | 14 | 7  |  | 3 | ATP-dependent RNA helicase DDX3X               |
| 75 | DDX17     | Q92841 [4]      | 80 kDa  | 0 | 15 | 13 |  | 3 | Probable ATP-dependent RNA helicase DDX17      |
| 76 | HNRNPU    | Q00839          | 91 kDa  | 0 | 20 | 5  |  | 3 | Heterogeneous nuclear ribonucleoprotein U      |
| 77 | HNRNPM    | P52272          | 78 kDa  | 0 | 23 | 15 |  | 3 | Heterogeneous nuclear ribonucleoprotein M      |
| 78 | HSPA9     | P38646          | 74 kDa  | 0 | 3  | 0  |  | 4 | Stress-70 protein, mitochondrial               |
| 79 | PPIB      | P23284          | 24 kDa  | 0 | 3  | 0  |  | 4 | Peptidyl-prolyl cis-trans isomerase B          |
| 80 | PDIA6     | Q15084          | 48 kDa  | 0 | 4  | 0  |  | 4 | Protein disulfide-isomerase A6                 |
| 81 | PDIA3     | P30101          | 57 kDa  | 0 | 4  | 8  |  | 4 | Protein disulfide-isomerase A3                 |
| 82 | CCT4      | P50991          | 58 kDa  | 0 | 5  | 0  |  | 4 | T-complex protein 1 subunit delta              |
| 83 | CSDE1     | O75534          | 89 kDa  | 0 | 7  | 3  |  | 4 | Cold shock domain-containing protein E1        |
| 84 | HSP90AB1  | P08238          | 83 kDa  | 0 | 11 | 0  |  | 4 | Cluster of Heat shock protein HSP 90-beta      |

|     |                 |                 |         |   |    |   |  |    |                                                      |
|-----|-----------------|-----------------|---------|---|----|---|--|----|------------------------------------------------------|
| 85  | G3BP1           | Q13283          | 52 kDa  | 0 | 3  | 0 |  | 6  | Ras GTPase-activating protein-binding protein 1      |
| 86  | STRAP           | Q9Y3F4          | 38 kDa  | 0 | 6  | 0 |  | 6  | Serine-threonine kinase receptor-associated protein  |
| 87  | RACK1           | P63244          | 35 kDa  | 0 | 8  | 0 |  | 6  | Receptor of activated protein C kinase 1             |
| 88  | UBB             | B4DV12 (+16)    | 17 kDa  | 0 | 3  | 0 |  | 11 | Polyubiquitin-B                                      |
| 89  | PHB             | C9JW96 (+1)     | 27 kDa  | 0 | 3  | 0 |  | 6  | Prohibitin                                           |
| 90  | MCM3            | J3KQ69 (+1)     | 92 kDa  | 0 | 3  | 0 |  | 6  | DNA replication licensing factor MCM3                |
| 91  | HIST1H1T        | P22492 [2]      | 22 kDa  | 0 | 3  | 4 |  | 6  | Cluster of Histone H1t                               |
| 92  | CRIP2           | H0YFA4 (+1)     | 21 kDa  | 0 | 3  | 4 |  | 6  | Cysteine-rich protein 2                              |
| 93  | XRCC6           | B1AHC9 (+1)     | 64 kDa  | 0 | 4  | 0 |  | 6  | X-ray repair cross-complementing protein 6           |
| 94  | DRG1            | Q9Y295          | 41 kDa  | 0 | 4  | 0 |  | 6  | Developmentally-regulated GTP-binding protein 1      |
| 95  | hCG_203956<br>6 | A0A0U1RR32 (+8) | 18 kDa  | 0 | 5  | 0 |  | 6  | Histone H2A                                          |
| 96  | ZNF90           | A0A087WZ27 (+2) | 14 kDa  | 0 | 6  | 0 |  | 6  | Zinc finger protein 90                               |
| 97  | C14orf166       | Q9Y224          | 28 kDa  | 0 | 7  | 0 |  | 6  | UPF0568 protein C14orf166                            |
| 98  | TRIM28          | Q13263          | 89 kDa  | 0 | 8  | 0 |  | 6  | Transcription intermediary factor 1-beta             |
| 99  | LRRC59          | Q96AG4          | 35 kDa  | 0 | 10 | 5 |  | 6  | Leucine-rich repeat-containing protein 59            |
| 100 | EIF2S3          | P41091          | 51 kDa  | 0 | 3  | 0 |  | 8  | Eukaryotic translation initiation factor 2           |
| 101 | LARS            | Q9P2J5          | 134 kDa | 0 | 3  | 0 |  | 8  | Leucine--tRNA ligase, cytoplasmic                    |
| 102 | EIF2S2          | P20042          | 38 kDa  | 0 | 3  | 0 |  | 8  | Eukaryotic translation initiation factor 2 subunit 2 |
| 103 | FARSB           | Q9NSD9          | 66 kDa  | 0 | 3  | 0 |  | 8  | Phenylalanine--tRNA ligase beta subunit              |
| 104 | EIF2S1          | P05198          | 36 kDa  | 0 | 4  | 0 |  | 8  | Eukaryotic translation initiation factor 2 subunit 1 |
| 105 | RARS            | P54136          | 75 kDa  | 0 | 4  | 0 |  | 8  | Arginine--tRNA ligase, cytoplasmic                   |
| 106 | EIF3D           | O15371          | 64 kDa  | 0 | 5  | 0 |  | 8  | Eukaryotic translation initiation factor 3 subunit D |
| 107 | MARS            | P56192          | 101 kDa | 0 | 5  | 0 |  | 8  | Methionine--tRNA ligase, cytoplasmic                 |
| 108 | NCL             | P19338          | 77 kDa  | 0 | 5  | 4 |  | 8  | Nucleolin                                            |
| 109 | EPRS            | P07814          | 171 kDa | 0 | 6  | 0 |  | 8  | Bifunctional glutamate/proline--tRNA ligase          |
| 110 | TUFM            | P49411          | 50 kDa  | 0 | 11 | 0 |  | 8  | Elongation factor Tu, mitochondrial O                |
| 111 | EEF2            | P13639          | 95 kDa  | 0 | 18 | 9 |  | 8  | Elongation factor 2                                  |
| 112 | KIF5B           | P33176          | 110 kDa | 0 | 4  | 0 |  | 9  | Kinesin-1 heavy chain                                |
| 113 | MYO6            | A0A0A0MRM8      | 145 kDa | 0 | 5  | 3 |  | 9  | Unconventional myosin-VI                             |
| 114 | COPA            | P53621          | 138 kDa | 0 | 6  | 0 |  | 9  | Coatomer subunit alpha                               |
| 115 | TRIM25          | Q14258          | 71 kDa  | 0 | 3  | 0 |  | 11 | E3 ubiquitin/ISG15 ligase TRIM25                     |

|     |       |        |        |   |   |   |  |    |                                          |
|-----|-------|--------|--------|---|---|---|--|----|------------------------------------------|
| 116 | UFL1  | O94874 | 90 kDa | 0 | 3 | 0 |  | 11 | E3 UFM1-protein ligase 1                 |
| 117 | USP10 | Q14694 | 87 kDa | 0 | 3 | 3 |  | 11 | Ubiquitin carboxyl-terminal hydrolase 10 |

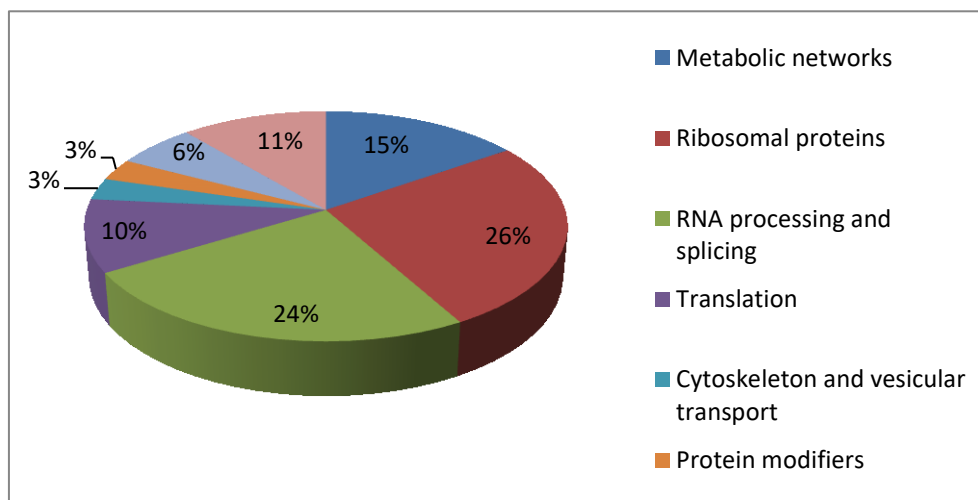

| Assigned number of protein function | Protein function                            | Number of proteins identified | Percentage |
|-------------------------------------|---------------------------------------------|-------------------------------|------------|
| 1                                   | <i>Metabolic networks</i>                   | 18                            | 15         |
| 2                                   | <i>Ribosomal proteins</i>                   | 31                            | 26         |
| 3                                   | <i>RNA processing and splicing</i>          | 28                            | 24         |
| 8                                   | <i>Translation</i>                          | 12                            | 10         |
| 9                                   | <i>Cytoskeleton and vesicular transport</i> | 3                             | 3          |
| 11                                  | <i>Protein modifiers</i>                    | 4                             | 3          |
| 4                                   | <i>Chaperons</i>                            | 7                             | 6          |
| 6                                   | <i>Other</i>                                | 14                            | 11         |
