# Supplementary material for: SEMG1/2 augment energy metabolism of tumor cells
Source: PubMed Central journal article supplement (PMC7733513; doi:10.1038/s41419-020-03251-w), 2020-12-11
Supplement: 41419_2020_3251_MOESM11_ESM.pdf [file 41419_2020_3251_MOESM11_ESM.pdf]

**ALL PROTEINS ASSOCIATED WITH SEMG2**

|                                                        |         |                 |         | Number of peptides associated with corresponding recombinant protein |           |           | Assigned number of protein function |
|--------------------------------------------------------|---------|-----------------|---------|----------------------------------------------------------------------|-----------|-----------|-------------------------------------|
|                                                        |         |                 |         | GST                                                                  | GST-SEMG1 | GST-SEMG2 |                                     |
| Fatty acid synthase                                    | FASN    | A0A0U1RQF0 (+1) | 273 kDa | 0                                                                    | 17        | 4         | 1                                   |
| Phosphoenolpyruvate carboxykinase [GTP], mitochondrial | PCK2    | Q16822          | 71 kDa  | 0                                                                    | 7         | 3         | 1                                   |
| Pyruvate kinase PKM                                    | PKM     | P14618          | 58 kDa  | 0                                                                    | 23        | 14        | 1                                   |
| Serine hydroxymethyltransferase, mitochondrial         | SHMT2   | P34897          | 56 kDa  | 0                                                                    | 8         | 3         | 1                                   |
| 40S ribosomal protein S17                              | RPS17   | P08708          | 16 kDa  | 0                                                                    | 6         | 3         | 2                                   |
| 40S ribosomal protein S4, X isoform                    | RPS4X   | P62701          | 30 kDa  | 0                                                                    | 9         | 3         | 2                                   |
| 40S ribosomal protein S5                               | RPS5    | P46782 (+1)     | 23 kDa  | 0                                                                    | 10        | 8         | 2                                   |
| 40S ribosomal protein S6                               | RPS6    | P62753          | 29 kDa  | 0                                                                    | 5         | 4         | 2                                   |
| 40S ribosomal protein S7                               | RPS7    | P62081          | 22 kDa  | 0                                                                    | 10        | 4         | 2                                   |
| 60S ribosomal protein L11                              | RPL11   | P62913          | 20 kDa  | 0                                                                    | 3         | 3         | 2                                   |
| 60S ribosomal protein L23a                             | RPL23A  | P62750          | 18 kDa  | 0                                                                    | 11        | 6         | 2                                   |
| 60S ribosomal protein L29                              | RPL29   | P47914          | 18 kDa  | 0                                                                    | 0         | 4         | 2                                   |
| 60S ribosomal protein L35                              | RPL35   | P42766          | 15 kDa  | 0                                                                    | 5         | 3         | 2                                   |
| Cluster of 60S ribosomal protein L26                   | RPL26   | P61254 [3]      | 17 kDa  | 0                                                                    | 8         | 6         | 2                                   |
| Heterogeneous nuclear ribonucleoprotein A1             | HNRNPA1 | F8W6I7 (+1)     | 33 kDa  | 0                                                                    | 8         | 4         | 3                                   |
| Heterogeneous nuclear ribonucleoprotein M              | HNRNPM  | P52272          | 78 kDa  | 0                                                                    | 13        | 5         | 3                                   |
| Poly(rC)-binding protein 1                             | PCBP1   | Q15365          | 37 kDa  | 0                                                                    | 5         | 4         | 3                                   |
| Probable ATP-dependent RNA helicase DDX17              | DDX17   | Q92841 (+1)     | 80 kDa  | 0                                                                    | 3         | 2         | 3                                   |
| Probable ATP-dependent RNA helicase DDX5               | DDX5    | P17844 (+1)     | 69 kDa  | 0                                                                    | 9         | 9         | 3                                   |
| Heterogeneous nuclear ribonucleoprotein M              | HNRNPM  | P52272          | 78 kDa  | 0                                                                    | 23        | 15        | 3                                   |
| Probable ATP-dependent RNA helicase DDX17              | DDX17   | Q92841 [4]      | 80 kDa  | 0                                                                    | 15        | 13        | 3                                   |
| ATP-dependent RNA helicase DDX1                        | DDX1    | Q92499          | 82 kDa  | 0                                                                    | 11        | 3         | 3                                   |
| ATP-dependent RNA helicase DDX3X                       | DDX3X   | A0A0D95F53 (+3) | 81 kDa  | 0                                                                    | 14        | 7         | 3                                   |
| Cluster of Poly(rC)-binding protein 1                  | PCBP1   | Q15365 [5]      | 37 kDa  | 0                                                                    | 9         | 4         | 3                                   |

|                                                   |           |                |         |   |    |    |   |
|---------------------------------------------------|-----------|----------------|---------|---|----|----|---|
| Heterogeneous nuclear ribonucleoprotein Q         | SYNCRIP   | O60506         | 70 kDa  | 0 | 8  | 2  | 3 |
| Heterogeneous nuclear ribonucleoprotein U         | HNRNPU    | Q00839         | 91 kDa  | 0 | 20 | 5  | 3 |
| Heterogeneous nuclear ribonucleoproteins A2/B1    | HNRNPA2B1 | P22626         | 37 kDa  | 0 | 9  | 8  | 3 |
| Non-POU domain-containing octamer-binding protein | NONO      | Q15233         | 54 kDa  | 0 | 3  | 11 | 3 |
| Paraspeckle component 1                           | PSPC1     | Q8WXF1         | 59 kDa  | 0 | 0  | 5  | 3 |
| Splicing factor, proline- and glutamine-rich      | SFPQ      | P23246         | 76 kDa  | 0 | 7  | 14 | 3 |
| tRNA-splicing ligase RtcB homolog                 | RTCB      | Q9Y3I0         | 55 kDa  | 0 | 7  | 6  | 3 |
| Cold shock domain-containing protein E1           | CSDE1     | O75534         | 89 kDa  | 0 | 7  | 3  | 4 |
| Protein disulfide-isomerase A3                    | PDIA3     | P30101         | 57 kDa  | 0 | 4  | 8  | 4 |
| THO complex subunit 4 OS                          | ALYREF    | Q86V81         | 27 kDa  | 0 | 0  | 4  | 4 |
| Cluster of Histone H1t                            | HIST1H1T  | P22492 [2]     | 22 kDa  | 0 | 3  | 4  | 6 |
| Cysteine-rich protein 2                           | CRIP2     | H0YFA4 (+1)    | 21 kDa  | 0 | 3  | 4  | 6 |
| Leucine-rich repeat-containing protein 59         | LRRC59    | Q96AG4         | 35 kDa  | 0 | 10 | 5  | 6 |
| Elongation factor 2                               | EEF2      | P13639         | 95 kDa  | 0 | 18 | 9  | 6 |
| Nucleolin                                         | NCL       | P19338         | 77 kDa  | 0 | 5  | 4  | 6 |
| Unconventional myosin-VI                          | MYO6      | AOA0AOMR<br>M8 | 145 kDa | 0 | 5  | 3  | 6 |
| Ubiquitin carboxyl-terminal hydrolase 10          | USP10     | Q14694         | 87 kDa  | 0 | 3  | 3  | 6 |

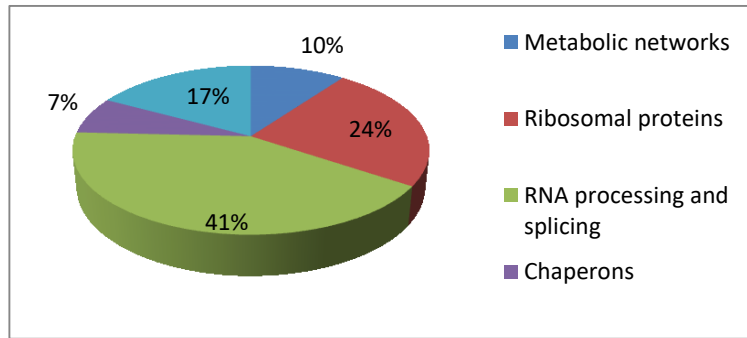

| Assigned number of protein function | Protein function            | Number of proteins identified | Percentage |
|-------------------------------------|-----------------------------|-------------------------------|------------|
| 1                                   | Metabolic networks          | 4                             | 10         |
| 2                                   | Ribosomal proteins          | 10                            | 24         |
| 3                                   | RNA processing and splicing | 17                            | 41         |
| 4                                   | Chaperons                   | 3                             | 7          |
| 6                                   | Other                       | 7                             | 17         |
