# Supplementary material for: SEMG1/2 augment energy metabolism of tumor cells
Source: PubMed Central journal article supplement (PMC7733513; doi:10.1038/s41419-020-03251-w), 2020-12-11
Supplement: 41419_2020_3251_MOESM13_ESM.pdf [file 41419_2020_3251_MOESM13_ESM.pdf]

PROTEINS ASSOCIATED ONLY WITH SEMG2

| Identified protein | Accession Number | Molecular weight | Number of peptides associated with corresponding recombinant protein |           |           |                           |
|--------------------|------------------|------------------|----------------------------------------------------------------------|-----------|-----------|---------------------------|
|                    |                  |                  | GST                                                                  | GST-SEMG1 | GST-SEMG2 |                           |
| RPL29              | P47914           | 18 kDa           | 0                                                                    | 0         | 4         | 60S ribosomal protein L29 |
| ALYREF             | Q86V81           | 27 kDa           | 0                                                                    | 0         | 4         | THO complex subunit 4 OS  |
| PSPC1              | Q8WXF1           | 59 kDa           | 0                                                                    | 0         | 5         | Paraspeckle component 1   |
