# Supplementary material for: SEMG1/2 augment energy metabolism of tumor cells
Source: PubMed Central journal article supplement (PMC7733513; doi:10.1038/s41419-020-03251-w), 2020-12-11
Supplement: 41419_2020_3251_MOESM14_ESM.pdf [file 41419_2020_3251_MOESM14_ESM.pdf]

**PROTEINS ASSOCIATED WITH BOTH SEMG1 and SEMG2**

| Identified protein | Accession Number | Molecular weight | Number of peptides associated with corresponding recombinant protein |           |           | Assigned number of protein function |                                                        |
|--------------------|------------------|------------------|----------------------------------------------------------------------|-----------|-----------|-------------------------------------|--------------------------------------------------------|
|                    |                  |                  | GST                                                                  | GST-SEMG1 | GST-SEMG2 |                                     |                                                        |
| PCK2               | Q16822           | 71 kDa           | 0                                                                    | 7         | 3         | 1                                   | Phosphoenolpyruvate carboxykinase [GTP], mitochondrial |
| SHMT2              | P34897           | 56 kDa           | 0                                                                    | 8         | 3         | 1                                   | Serine hydroxymethyltransferase, mitochondrial         |
| FASN               | A0A0U1RQF0 (+1)  | 273 kDa          | 0                                                                    | 17        | 4         | 1                                   | Fatty acid synthase                                    |
| PKM                | P14618           | 58 kDa           | 0                                                                    | 23        | 14        | 1                                   | Pyruvate kinase PKM                                    |
| RPL11              | P62913           | 20 kDa           | 0                                                                    | 3         | 3         | 2                                   | 60S ribosomal protein L11                              |
| RPL35              | P42766           | 15 kDa           | 0                                                                    | 5         | 3         | 2                                   | 60S ribosomal protein L35                              |
| RPS6               | P62753           | 29 kDa           | 0                                                                    | 5         | 4         | 2                                   | 40S ribosomal protein S6                               |
| RPS17              | P08708           | 16 kDa           | 0                                                                    | 6         | 3         | 2                                   | 40S ribosomal protein S17                              |
| RPL26              | P61254 [3]       | 17 kDa           | 0                                                                    | 8         | 6         | 2                                   | Cluster of 60S ribosomal protein L26                   |
| RPS4X              | P62701           | 30 kDa           | 0                                                                    | 9         | 3         | 2                                   | 40S ribosomal protein S4, X isoform                    |
| RPS7               | P62081           | 22 kDa           | 0                                                                    | 10        | 4         | 2                                   | 40S ribosomal protein S7                               |
| RPS5               | P46782 (+1)      | 23 kDa           | 0                                                                    | 10        | 8         | 2                                   | 40S ribosomal protein S5                               |
| RPL23A             | P62750           | 18 kDa           | 0                                                                    | 11        | 6         | 2                                   | 60S ribosomal protein L23a                             |
| DDX17              | Q92841 (+1)      | 80 kDa           | 0                                                                    | 3         | 2         | 3                                   | Probable ATP-dependent RNA helicase DDX17              |
| NONO               | Q15233           | 54 kDa           | 0                                                                    | 3         | 11        | 3                                   | Non-POU domain-containing octamer-binding protein      |
| PCBP1              | Q15365           | 37 kDa           | 0                                                                    | 5         | 4         | 3                                   | Poly(rC)-binding protein 1                             |
| RTCB               | Q9Y310           | 55 kDa           | 0                                                                    | 7         | 6         | 3                                   | tRNA-splicing ligase RtcB homolog                      |
| SFPQ               | P23246           | 76 kDa           | 0                                                                    | 7         | 14        | 3                                   | Splicing factor, proline- and glutamine-rich           |
| SYNCRIP            | O60506           | 70 kDa           | 0                                                                    | 8         | 2         | 3                                   | Heterogeneous nuclear ribonucleoprotein Q              |
| HNRNPA1            | F8W617 (+1)      | 33 kDa           | 0                                                                    | 8         | 4         | 3                                   | Heterogeneous nuclear ribonucleoprotein A1             |
| PCBP1              | Q15365 [5]       | 37 kDa           | 0                                                                    | 9         | 4         | 3                                   | Cluster of Poly(rC)-binding protein 1                  |
| HNRNPA2B1          | P22626           | 37 kDa           | 0                                                                    | 9         | 8         | 3                                   | Heterogeneous nuclear ribonucleoproteins A2/B1         |
| DDX5               | P17844 (+1)      | 69 kDa           | 0                                                                    | 9         | 9         | 3                                   | Probable ATP-dependent RNA helicase DDX5               |
| DDX1               | Q92499           | 82 kDa           | 0                                                                    | 11        | 3         | 3                                   | ATP-dependent RNA helicase DDX1                        |
| HNRNPM             | P52272           | 78 kDa           | 0                                                                    | 13        | 5         | 3                                   | Heterogeneous nuclear ribonucleoprotein M              |
| DDX3X              | A0A0D9SF53 (+3)  | 81 kDa           | 0                                                                    | 14        | 7         | 3                                   | ATP-dependent RNA helicase DDX3X                       |
| DDX17              | Q92841 [4]       | 80 kDa           | 0                                                                    | 15        | 13        | 3                                   | Probable ATP-dependent RNA helicase DDX17              |

|          |             |         |   |    |    |   |                                           |
|----------|-------------|---------|---|----|----|---|-------------------------------------------|
| HNRNPU   | Q00839      | 91 kDa  | 0 | 20 | 5  | 3 | Heterogeneous nuclear ribonucleoprotein U |
| HNRNPM   | P52272      | 78 kDa  | 0 | 23 | 15 | 3 | Heterogeneous nuclear ribonucleoprotein M |
| PDIA3    | P30101      | 57 kDa  | 0 | 4  | 8  | 4 | Protein disulfide-isomerase A3            |
| CSDE1    | O75534      | 89 kDa  | 0 | 7  | 3  | 4 | Cold shock domain-containing protein E1   |
| HIST1H1T | P22492 [2]  | 22 kDa  | 0 | 3  | 4  | 6 | Cluster of Histone H1t                    |
| CRIP2    | H0YFA4 (+1) | 21 kDa  | 0 | 3  | 4  | 6 | Cysteine-rich protein 2                   |
| LRRC59   | Q96AG4      | 35 kDa  | 0 | 10 | 5  | 6 | Leucine-rich repeat-containing protein 59 |
| NCL      | P19338      | 77 kDa  | 0 | 5  | 4  | 6 | Nucleolin                                 |
| EEF2     | P13639      | 95 kDa  | 0 | 18 | 9  | 6 | Elongation factor 2                       |
| MYO6     | A0A0A0MRM8  | 145 kDa | 0 | 5  | 3  | 6 | Unconventional myosin-VI                  |
| USP10    | Q14694      | 87 kDa  | 0 | 3  | 3  | 6 | Ubiquitin carboxyl-terminal hydrolase 10  |

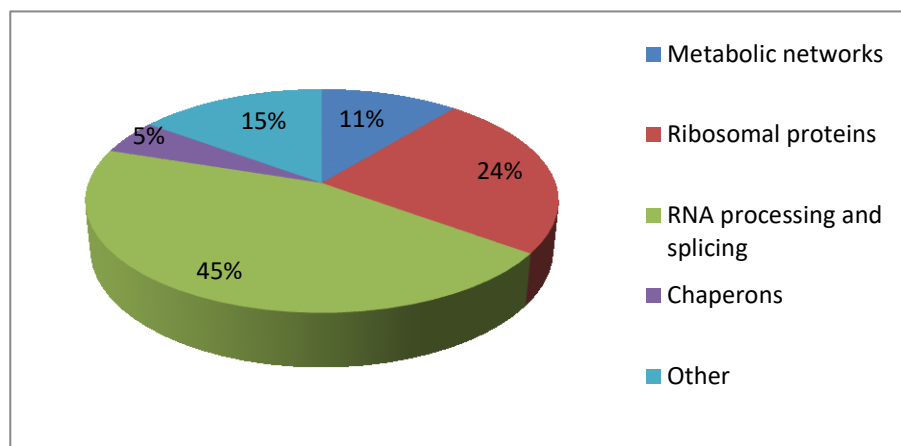

| Assigned number of protein function | Protein function            | Number of proteins identified | Percentage |
|-------------------------------------|-----------------------------|-------------------------------|------------|
| 1                                   | Metabolic networks          | 4                             | 11         |
| 2                                   | Ribosomal proteins          | 9                             | 24         |
| 3                                   | RNA processing and splicing | 16                            | 45         |
| 4                                   | Chaperons                   | 2                             | 5          |
|                                     | Other                       | 7                             | 15         |
